# Supplementary material
Source: ML conference proceedings conference paper supplement (https://proceedings.mlr.press/v80/wang18k.html)
Supplement: Supplementary file 1 [file wang18k-supp.pdf]

## A. Proofs

### A.1. Proposition 2

Since  $B \in \mathcal{B}$ , we have

$$\|B(:, r)\|_2 \leq 1, \forall r = 1, \dots, R, \quad (17)$$

so that

$$\|B\|_F \leq \sqrt{R}. \quad (18)$$

Therefore, when

(i)  $W_i \in \mathcal{W}_{\ell 1}$ : Use (18), we can write

$$\|BW_i(:, k)\|_2 \leq \|B\|_F \|W_i(:, k)\|_2 \leq \sqrt{R} \|W_i(:, k)\|_2.$$

Thus, if  $\sqrt{R} \|W_i(:, k)\|_2 \leq 1$ , then

$$\|BW_i(:, k)\|_2 \leq \sqrt{R} \|W_i(:, k)\|_2 \leq 1,$$

which means  $\|BW_i(:, k)\|_2 \leq 1$ .

(ii)  $W_i \in \mathcal{W}_{\ell 2}$ : First, we have  $BW_i(:, k) = \sum_{r=1}^R W_i(r, k)B(:, r)$ . Then, by Cauchy-Schwarz inequality, we have

$$\begin{aligned} \|BW_i(:, k)\|_2 &= \left\| \sum_{r=1}^R W_i(r, k)B(:, r) \right\|_2 \\ &\leq \sum_{r=1}^R \|W_i(r, k)B(:, r)\|_2 \\ &\leq \sum_{r=1}^R |W_i(r, k)| \|B(:, r)\|_2 \\ &= \sum_{r=1}^R |W_i(r, k)| = \|W_i(:, k)\|_1, \end{aligned} \quad (19)$$

where (19) is due to (17). Therefore, if  $\|W_i(:, k)\|_1 \leq 1$ ,  $\|BW_i(:, k)\|_2 \leq 1$  holds.

### A.2. Proposition 3

Let  $\tilde{B}(:, r) \equiv \mathcal{F}(B(:, r))$ , (12) is equivalent to (11) since the following equations hold:

$$\begin{aligned} f_i(B, W_i, Z_i) &= \frac{1}{2} \left\| x_i - \sum_{k=1}^K \left( \sum_{r=1}^R W_i(r, k)B(:, r) \right) * Z_i(:, k) \right\|_2^2, \\ &= \frac{1}{2} \left\| x_i - \sum_{r=1}^R B(:, r) * \left( \sum_{k=1}^K W_i(r, k)Z_i(:, k) \right) \right\|_2^2, \\ &= \frac{1}{2P} \left\| \mathcal{F}(x_i) - \sum_{r=1}^R \mathcal{F}(B(:, r)) \odot \mathcal{F}(Z_i W_i^\top(:, r)) \right\|_2^2, \\ &= \tilde{f}_i(\tilde{B}, W_i, Z_i), \end{aligned} \quad (20)$$

where (20) is due to

$$\begin{aligned} &\sum_{k=1}^K \left( \sum_{r=1}^R W_i(r, k)B(:, r) \right) * Z_i(:, k) \\ &= \sum_{r=1}^R B(:, r) * \left( \sum_{k=1}^K W_i(r, k)Z_i(:, k) \right). \end{aligned}$$

Then, (21) comes from the convolution theorem (Mallat, 1999), i.e.,

$$\mathcal{F}(B(:, r) * Z_i W_i^\top(:, r)) = \mathcal{F}(B(:, r)) \odot \mathcal{F}(Z_i W_i^\top(:, r)),$$

where  $B(:, r)$  and  $Z_i W_i^\top(:, r)$  are first zero-padded to  $P$ -dimensional, and the Parseval's theorem (Mallat, 1999):  $\frac{1}{P} \|\mathcal{F}(x)\|_2^2 = \|x\|_2^2$  where  $x \in \mathbb{R}^P$ .

As for constraints, when  $B$  is transformed to the frequency domain, it is padded from  $M$  dimensional to  $P$  dimensional. Thus, we use  $\mathcal{C}(\mathcal{F}^{-1}(\tilde{B}))$  to crop the extra dimensions to get back the original support.
